# Supplementary material for: Emission behaviour of a series of bimetallic Cd(ii)–Au(i) coordination polymers
Source: Royal Society of Chemistry journal article supplement (doi:10.1039/c6dt00537c), 2016-01-01
Supplement: c6dt00537c1.pdf [file c6dt00537c1.pdf]

## Supporting Information

### Emission Behaviour of a Series of Bimetallic Cd(II)-Au(I)

#### Coordination Polymers

Akihiko Yamagishi,<sup>a</sup> Takeshi Kawasaki,<sup>a</sup> Kei Hiruma,<sup>a</sup> Hisako Sato,<sup>b\*</sup> and Takafumi Kitazawa<sup>a\*</sup>

<sup>a</sup>Department of Chemistry, Toho University, Funabashi, Chiba 274-8510, Japan,

<sup>b</sup>Department of Chemistry, Graduate School of Science and Engineering, Ehime University, Matsuyama 790-8577, Japan

#### Contents

- 1) Elemental analyses of  $[\text{Cd}(\text{pyridine derivative})_2][\text{Au}(\text{CN})_2]_2$ .
- 2) The IR frequency of  $\text{C} \equiv \text{N}$  stretching vibration for  $[\text{Cd}(\text{pyridine derivative})_2][\text{Au}(\text{CN})_2]_2$ . The measurements were performed on KBr disks at room temperature.
- 3) Crystal data for  $[\text{Cd}(\text{pyridine derivative})_2][\text{Au}(\text{CN})_2]_2$
- 4) Selected bond lengths for  $[\text{Cd}(\text{pyridine derivative})_2][\text{Au}(\text{CN})_2]_2$
- 5) Doubly interpenetrated  $\text{Cd}[\text{Au}(\text{CN})_2]_2$  frameworks (red and blue) of  $[\text{Cd}(4\text{-ethylpyridine})_2][\text{Au}(\text{CN})_2]_2$
- 6) Local structure around the Cd(II) ion of  $[\text{Cd}(3,5\text{-lutidine})_2][\text{Au}(\text{CN})_2]_2$ .
- 7) Comparison of the powder diffraction patterns of  $[\text{Cd}(4\text{-ethylpyridine})_2][\text{Au}(\text{CN})_2]_2$  between the powder and crystalline samples
- 8) The temperature dependence of the decay rates of the emission from  $[\text{Cd}(4\text{-ethylpyridine})_2][\text{Au}(\text{CN})_2]_2$ .
- 9) The excitation spectra of  $[\text{Cd}(\text{pyridine derivative})_2][\text{Au}(\text{CN})_2]_2$

**S1. Elemental analyses of [Cd(pyridine derivative)<sub>2</sub>][Au(CN)<sub>2</sub>]<sub>2</sub>.**

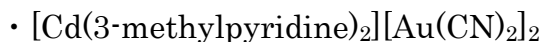

Anal. Calcd. for C<sub>16</sub>H<sub>14</sub>Au<sub>2</sub>CdN<sub>6</sub> (796.67): C, 24.12; H, 1.77; N, 10.55. Found: C, 24.13; H, 1.81; N, 10.39.

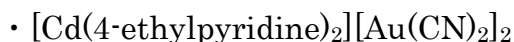

Anal, Calcd. for C<sub>18</sub>H<sub>18</sub>Au<sub>2</sub>CdN<sub>6</sub> (824.72): C, 26.21; H, 2.20; N, 10.19. Found: C, 26.10; H, 2.23; N, 10.24.

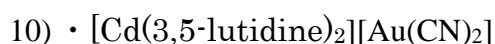

Anal, Calcd. for C<sub>18</sub>H<sub>18</sub>Au<sub>2</sub>CdN<sub>6</sub> (824.72): C, 26.21; H, 2.20; N, 10.19. Found: C, 26.18; H, 2.29; N, 10.21.

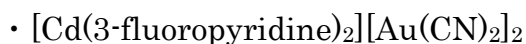

Anal, Calcd. for C<sub>14</sub>H<sub>8</sub>Au<sub>2</sub>CdN<sub>6</sub>F<sub>2</sub> (804.59): C, 20.90; H, 1.00; N, 10.45. Found: C, 20.82; H, 1.09; N, 10.52.

**S2. The IR frequency of C ≡ N stretching vibration for [Cd(pyridine derivative)<sub>2</sub>][Au(CN)<sub>2</sub>]<sub>2</sub>. The measurements were performed on KBr disks at room temperature.**

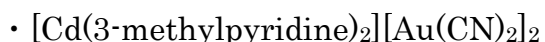

IR(cm<sup>-1</sup>, KBr):2170(C≡N), 1605(C=N)

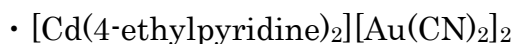

IR(cm<sup>-1</sup>, KBr):2151(C≡N), 1617(C=N)

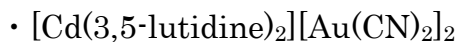

IR(cm<sup>-1</sup>, KBr):2163(C≡N), 1600(C=N)

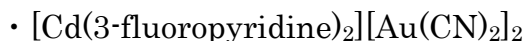

IR(cm<sup>-1</sup>, KBr):2173(C≡N), 1607(C=N)

**Table S1. Crystal data for [Cd(L)<sub>2</sub>][Au(CN)<sub>2</sub>]<sub>2</sub>**

| L                                                             | 3-methylpyridine                                                 |                                                                  | 4-ethylpyridine                                                                 | 3,5-lutidine                                                     |                                          |                                          | 3-fluoropyridine                                                               |
|---------------------------------------------------------------|------------------------------------------------------------------|------------------------------------------------------------------|---------------------------------------------------------------------------------|------------------------------------------------------------------|------------------------------------------|------------------------------------------|--------------------------------------------------------------------------------|
| Empirical formula                                             | C <sub>16</sub> H <sub>14</sub> Au <sub>2</sub> CdN <sub>6</sub> | C <sub>16</sub> H <sub>14</sub> Au <sub>2</sub> CdN <sub>6</sub> | C <sub>36</sub> H <sub>36</sub> Au <sub>4</sub> Cd <sub>2</sub> N <sub>12</sub> | C <sub>18</sub> H <sub>18</sub> Au <sub>2</sub> CdN <sub>6</sub> |                                          |                                          | C <sub>14</sub> H <sub>8</sub> Au <sub>2</sub> CdF <sub>2</sub> N <sub>6</sub> |
| Formula weight                                                | 796.67                                                           | 796.67                                                           | 1649.43                                                                         | 824.72                                                           | 824.72                                   | 824.72                                   | 804.60                                                                         |
| Temperature / K                                               | 180                                                              | 90                                                               | 90                                                                              | 298                                                              | 180                                      | 90                                       | 298                                                                            |
| Crystal system                                                | Monoclinic                                                       | Monoclinic                                                       | Monoclinic                                                                      | Orthorhombic                                                     | Orthorhombic                             | Orthorhombic                             | Monoclinic                                                                     |
| Space group                                                   | <i>P</i> 2 <sub>1</sub> / <i>c</i>                               | <i>P</i> 2 <sub>1</sub> / <i>c</i>                               | <i>C</i> 2/ <i>c</i>                                                            | <i>Pca</i> 2 <sub>1</sub>                                        | <i>Pca</i> 2 <sub>1</sub>                | <i>Pca</i> 2 <sub>1</sub>                | <i>P</i> 2 <sub>1</sub> / <i>c</i>                                             |
| <i>a</i> / Å                                                  | 8.9854(11)                                                       | 8.8666(5)                                                        | 37.679(2)                                                                       | 15.2393(13)                                                      | 15.210(3)                                | 15.1496(19)                              | 9.0272(18)                                                                     |
| <i>b</i> / Å                                                  | 15.802(2)                                                        | 15.8409(9)                                                       | 10.8471(6)                                                                      | 9.1490(8)                                                        | 9.1078(14)                               | 9.0705(11)                               | 14.335(3)                                                                      |
| <i>c</i> / Å                                                  | 14.9145(19)                                                      | 14.8945(9)                                                       | 21.4546(13)                                                                     | 15.5747(13)                                                      | 15.634(3)                                | 15.6694(19)                              | 15.885(3)                                                                      |
| $\alpha$ / °                                                  | 90                                                               | 90                                                               | 90                                                                              | 90                                                               | 90                                       | 90                                       | 90                                                                             |
| $\beta$ / °                                                   | 101.732(2)                                                       | 100.9240(10)                                                     | 98.9860(10)                                                                     | 90                                                               | 90                                       | 90                                       | 94.004(3)                                                                      |
| $\gamma$ / °                                                  | 90                                                               | 90                                                               | 90                                                                              | 90                                                               | 90                                       | 90                                       | 90                                                                             |
| <i>V</i> / Å <sup>3</sup>                                     | 2073.4(5)                                                        | 2054.1(2)                                                        | 8661.0(9)                                                                       | 2171.5(3)                                                        | 2165.8(6)                                | 2153.2(5)                                | 2050.7(7)                                                                      |
| <i>Z</i>                                                      | 4                                                                | 4                                                                | 8                                                                               | 4                                                                | 4                                        | 4                                        | 4                                                                              |
| <i>d</i> <sub>calc</sub> / Mg m <sup>-3</sup>                 | 2.552                                                            | 2.576                                                            | 2.530                                                                           | 2.523                                                            | 2.529                                    | 2.544                                    | 2.606                                                                          |
| $\mu$ / mm <sup>-1</sup>                                      | 15.142                                                           | 15.285                                                           | 14.505                                                                          | 14.463                                                           | 14.501                                   | 14.586                                   | 15.325                                                                         |
| F(000)                                                        | 1432                                                             | 1432                                                             | 5984                                                                            | 1496                                                             | 1496                                     | 1496                                     | 1432                                                                           |
| $\vartheta$ range for data collection / °                     | 1.90 to 30.99                                                    | 1.90 to 31.09                                                    | 2.14 to 28.28                                                                   | 2.23 to 29.91                                                    | 2.24 to 28.28                            | 2.25 to 28.28                            | 1.92 to 23.67                                                                  |
| Reflections collected                                         | 14672                                                            | 15157                                                            | 28300                                                                           | 15073                                                            | 13827                                    | 13670                                    | 9224                                                                           |
| Independent reflections                                       | 6027 [ <i>R</i> <sub>int</sub> = 0.0579]                         | 6025 [ <i>R</i> <sub>int</sub> = 0.0284]                         | 10716 [ <i>R</i> <sub>int</sub> = 0.0362]                                       | 5959 [ <i>R</i> <sub>int</sub> = 0.0396]                         | 3985 [ <i>R</i> <sub>int</sub> = 0.0459] | 4886 [ <i>R</i> <sub>int</sub> = 0.0375] | 3076 [ <i>R</i> <sub>int</sub> = 0.0514]                                       |
| GOF                                                           | 0.998                                                            | 0.998                                                            | 1.054                                                                           | 0.889                                                            | 0.986                                    | 0.869                                    | 1.044                                                                          |
| <i>R</i> , <i>wR</i> 2 [ <i>I</i> > 2 $\sigma$ ( <i>I</i> )]  | 0.0463, 0.1161                                                   | 0.0270, 0.0601                                                   | 0.0528, 0.1362                                                                  | 0.0340, 0.0644                                                   | 0.0257, 0.0511                           | 0.0229, 0.0456                           | 0.0468, 0.1105                                                                 |
| <i>R</i> , <i>wR</i> 2 (all data)                             | 0.0636, 0.1280                                                   | 0.0415, 0.0647                                                   | 0.0574, 0.1407                                                                  | 0.0521, 0.0709                                                   | 0.0318, 0.0531                           | 0.0280, 0.0473                           | 0.0780, 0.1223                                                                 |
| Flack parameter <sup>1)</sup>                                 | -                                                                | -                                                                | -                                                                               | 0.024(7)                                                         | 0.033(7)                                 | 0.031(5)                                 | -                                                                              |
| $\Delta\rho_{\max}$ , $\Delta\rho_{\min}$ / e Å <sup>-3</sup> | 1.569, -3.077                                                    | 1.461, -2.185                                                    | 8.72, -4.458                                                                    | 0.859, -1.084                                                    | 1.033, -1.485                            | 1.703, -1.389                            | 1.656, -1.085                                                                  |

$$R = \sum ||F_o| - |F_c|| / \sum |F_o|, wR2 = \{\sum w(|F_o| - |F_c|)^2 / \sum w(F_o)^2\}^{1/2}$$

Reference 1) H. D. Flack, *Acta Crystallogra., Sect. A*, 1983, **A39**, 876.

**Table S2. Selected bond lengths for [Cd(L)<sub>2</sub>][Au(CN)<sub>2</sub>]<sub>2</sub>**

| L = 3-methylpyridine |                      |                     |           | L = 4-ethylpyridine      |           |         |          | L = 3,5-lutidine     |                    |                      | L = 3-fluoropyridine |                      |           |                      |            |
|----------------------|----------------------|---------------------|-----------|--------------------------|-----------|---------|----------|----------------------|--------------------|----------------------|----------------------|----------------------|-----------|----------------------|------------|
| 180 K                | 90 K                 |                     |           | 90 K                     |           |         |          | 298 K                | 180 K              | 90 K                 | 298 K                |                      |           |                      |            |
| Cd1-N1               | 2.353(6)             | Cd1-N1              | 2.325(4)  | Au1-C1                   | 1.986(8)  | Cd1-N10 | 2.308(7) | Cd1-N1               | 2.407(8)           | Cd1-N1               | 2.394(7)             | Cd1-N1               | 2.380(6)  | Cd1-N1               | 2.304(13)  |
| Cd1-N2               | 2.330(5)             | Cd1-N2              | 2.334(4)  | Au1-C19                  | 1.981(8)  | Cd1-N8  | 2.369(7) | Cd1-N2               | 2.376(7)           | Cd1-N2               | 2.411(7)             | Cd1-N2               | 2.386(5)  | Cd1-N2               | 2.328(13)  |
| Cd1-N3               | 2.343(6)             | Cd1-N3              | 2.328(4)  | Au2-C35 <sup>1</sup>     | 1.985(8)  | Cd1-N9  | 2.353(7) | Cd1-N3               | 2.379(8)           | Cd1-N3               | 2.383(7)             | Cd1-N3               | 2.380(5)  | Cd1-N3               | 2.319(14)  |
| Cd1-N4               | 2.329(5)             | Cd1-N4              | 2.353(4)  | Au2-C36                  | 1.985(8)  | Cd1-N11 | 2.366(7) | Cd1-N4               | 2.409(7)           | Cd1-N4               | 2.369(6)             | Cd1-N4               | 2.386(6)  | Cd1-N4               | 2.351(13)  |
| Cd1-N5               | 2.376(5)             | Cd1-N5              | 2.357(3)  | Au3-C2 <sup>2</sup>      | 1.999(8)  | Cd1-N12 | 2.350(7) | Cd1-N5               | 2.327(6)           | Cd1-N5               | 2.326(6)             | Cd1-N5               | 2.329(5)  | Cd1-N5               | 2.406(12)  |
| Cd1-N6               | 2.367(6)             | Cd1-N6              | 2.361(4)  | Au3-C4                   | 1.993(8)  | Cd2-N1  | 2.405(7) | Cd1-N6               | 2.337(8)           | Cd1-N6               | 2.338(6)             | Cd1-N6               | 2.323(5)  | Cd1-N6               | 2.383(11)  |
| Au1-C3 <sup>1</sup>  | 1.994(6)             | Au1-C1 <sup>1</sup> | 1.976(4)  | Au4-C3                   | 1.994(9)  | Cd2-N2  | 2.335(8) | Au1-C1               | 1.992(9)           | Au1-C1               | 1.980(8)             | Au1-C1               | 1.998(7)  | Au1-C1               | 2.004(16)  |
| Au1-C4               | 1.989(6)             | Au1-C4              | 1.987(4)  | Au4-C34 <sup>3</sup>     | 1.992(8)  | Cd2-N3  | 2.333(7) | Au1-C4 <sup>1</sup>  | 2.002(9)           | Au1-C4 <sup>1</sup>  | 1.995(8)             | Au1-C4 <sup>1</sup>  | 2.007(7)  | Au1-C4 <sup>1</sup>  | 1.991(18)  |
| Au2-C1 <sup>2</sup>  | 1.985(6)             | Au2-C2 <sup>2</sup> | 1.980(4)  | Au1-Au2 <sup>4</sup>     | 3.0941(5) | Cd2-N4  | 2.351(8) | Au2-C2 <sup>2</sup>  | 1.974(9)           | Au2-C2 <sup>2</sup>  | 2.010(8)             | Au2-C2 <sup>2</sup>  | 1.985(6)  | Au2-C2 <sup>2</sup>  | 1.999(16)  |
| Au2-C2 <sup>3</sup>  | 1.978(6)             | Au2-C3 <sup>3</sup> | 1.988(4)  | Au2-Au3 <sup>5</sup>     | 3.2467(5) | Cd2-N5  | 2.291(7) | Au2-C3               | 1.990(9)           | Au2-C3               | 2.008(9)             | Au2-C3               | 2.005(7)  | Au2-C3               | 1.949(17)  |
| Au1-Au2              | 3.1479(6)            | Au1-Au2             | 3.1271(3) | Au3-Au4 <sup>6</sup>     | 3.1219(4) | Cd2-N6  | 2.304(7) | Au1-Au2 <sup>3</sup> | 3.1440(6)          | Au1-Au2 <sup>3</sup> | 3.1419(6)            | Au1-Au2 <sup>3</sup> | 3.1345(5) | Au1-Au2 <sup>3</sup> | 3.1874(11) |
| Symmetry codes       | Symmetry codes       |                     |           | Symmetry codes           |           |         |          |                      | Symmetry codes     | Symmetry codes       | Symmetry codes       | Symmetry codes       |           |                      |            |
| 1: x,-y+1/2,z+1/2    | 1: x,-y+1/2,z+1/2    |                     |           | 1: x, y+1, z             |           |         |          |                      | 1: -x+5/2,y,z+1/2  | 1: -x+1/2,y,z-1/2    | 1: -x+5/2,y,z+1/2    | 1: x,-y+3/2,z+1/2    |           |                      |            |
| 2: -x+1,-y+1,-z+1    | 2: -x+1,y-1/2,-z+1/2 |                     |           | 2: x, -y+1, z-1/2        |           |         |          |                      | 2: -x+3/2,y,z-1/2  | 2: -x+3/2,y,z+1/2    | 2: -x+3/2,y,z-1/2    | 2: x,-y+5/2,z-1/2    |           |                      |            |
| 3: -x+1,y-1/2,-z+1/2 | 3: -x+1,-y+1,-z+1    |                     |           | 3: x-1/2, y+1/2, z       |           |         |          |                      | 3: -x+2,-y+1,z+1/2 | 3: -x+1,-y+1,z-1/2   | 3: -x+2,-y+2,z+1/2   | 3: -x+1,y-1/2,-z+3/2 |           |                      |            |
|                      |                      |                     |           | 4: -x+1/2, y-1/2, -z+1/2 |           |         |          |                      |                    |                      |                      |                      |           |                      |            |
|                      |                      |                     |           | 5: -x+1/2, y+1/2, -z+1/2 |           |         |          |                      |                    |                      |                      |                      |           |                      |            |
|                      |                      |                     |           | 6: -x, y, -z+1/2.        |           |         |          |                      |                    |                      |                      |                      |           |                      |            |

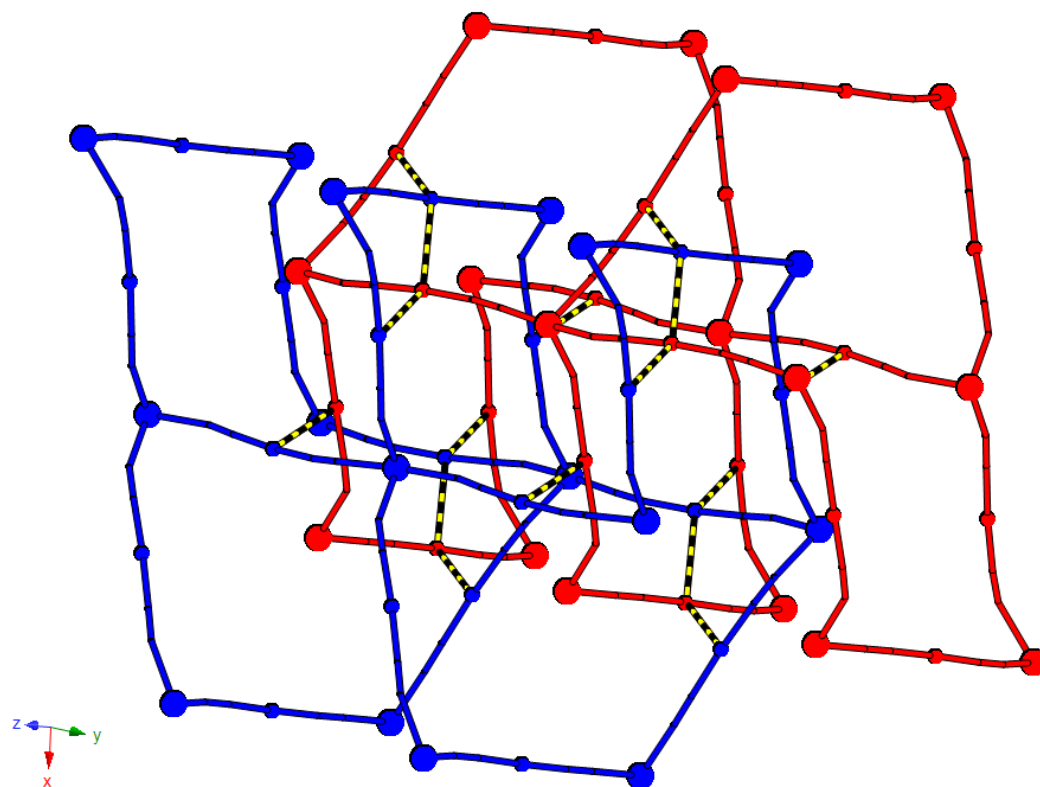

Figure S1. Doubly interpenetrated  $\text{Cd}[\text{Au}(\text{CN})_2]_2$  frameworks (red and blue) of  $[\text{Cd}(4\text{-ethylpyridine})_2][\text{Au}(\text{CN})_2]_2$

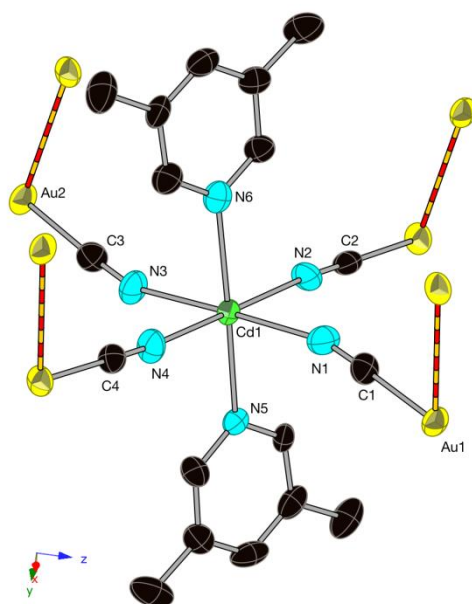

Figure S2. Local structure around Cd(II) ion of  $[\text{Cd}(3,5\text{-lutidine})_2][\text{Au}(\text{CN})_2]_2$ .  
Displacement ellipsoids are drawn 50 % probability level.  
H atoms are omitted for clarity.

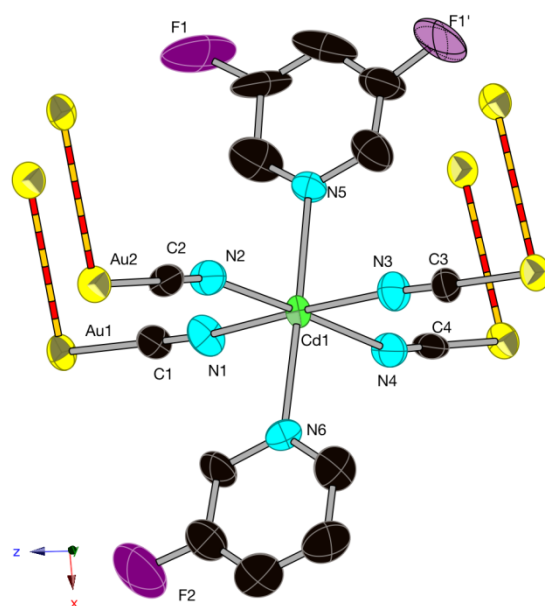

Figure S3. Local structure around Cd(II) ion of [Cd(3-fluoropyridine)<sub>2</sub>][Au(CN)<sub>2</sub>]<sub>2</sub>.  
Displacement ellipsoids are drawn 30 % probability level.  
H atoms are omitted for clarity.

**S4. Comparison of the power diffraction patterns of [Cd(4-ethylpyridine)<sub>2</sub>][Au(CN)<sub>2</sub>]<sub>2</sub> between the powder and crystalline samples**

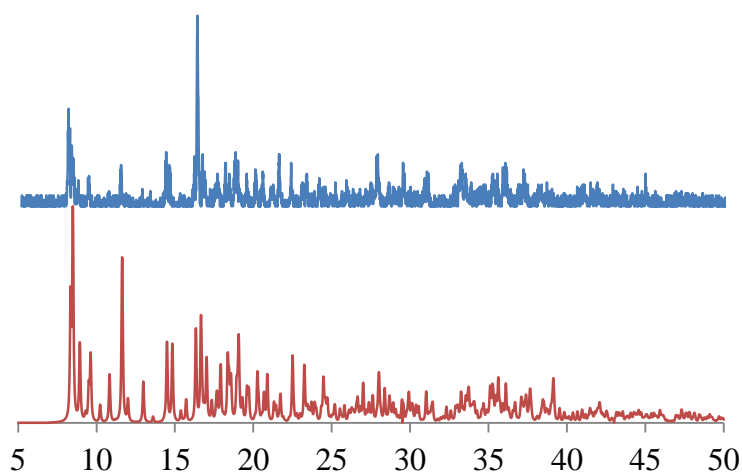

Figure S4. The X-ray diffraction patterns of the powder sample of [Cd(4-ethylpyridine)<sub>2</sub>][Au(CN)<sub>2</sub>]<sub>2</sub> : (upper) the prepared sample and (lower) the simulation from the single crystal X-ray analysis.

**S5. The temperature dependence of the decay rates of the emission from**

**[Cd(4-ethylpyridine)<sub>2</sub>][Au(CN)<sub>2</sub>]<sub>2</sub>.**

Table S3: The results of two components in the decay of mission at various temperatures

| Temperature[K] | Relaxation time ( $\mu$ s) |        | Fractions |          |
|----------------|----------------------------|--------|-----------|----------|
|                | fast                       | slow   | fast      | slow     |
| 183            | 0.932                      | 2.442  | 0.0381    | 1.95E-02 |
| 193            | 1.081                      | 2.752  | 0.0425    | 1.05E-02 |
| 203            | 1.137                      | 7.438  | 0.0498    | 1.31E-03 |
| 213            | 0.896                      | 17.222 | 0.0504    | 7.67E-04 |
| 223            | 0.676                      | 35.875 | 0.049     | 6.96E-04 |
| 233            | 0.492                      | 20.283 | 0.0445    | 6.03E-04 |
| 243            | 0.351                      | 42.672 | 0.0389    | 8.51E-04 |
| 253            | 0.262                      | 17.104 | 0.0309    | 5.70E-04 |
| 263            | 0.178                      | 35.754 | 0.0197    | 4.56E-04 |
| 273            | 0.152                      | 16.249 | 0.0164    | 6.38E-04 |
| 283            | 0.132                      | 48.914 | 0.0111    | 8.63E-04 |
| 293            | 0.118                      | 26.395 | 0.0068    | 6.75E-04 |

The rate of the fast decay component ( $1/\tau_i : i = 1$ ) is plotted against temperature (K) as below:



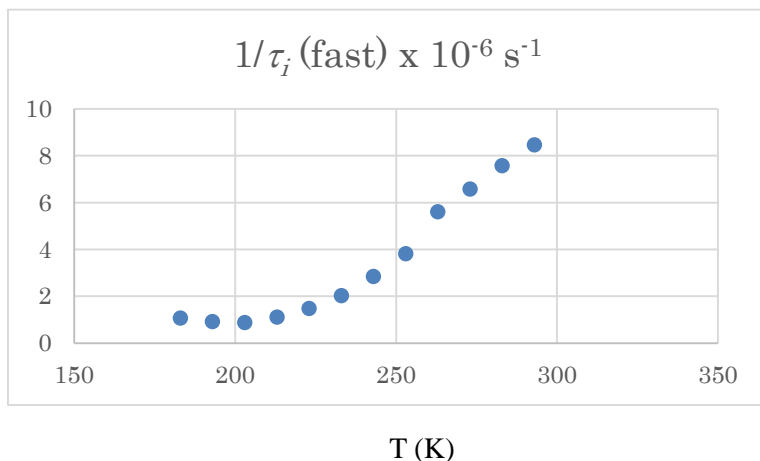

Figure S5. The plot of the rate of emission decay against temperature in case of  $[\text{Cd}(\text{4-ethylpyridine})_2][\text{Au}(\text{CN})_2]_2$ .

The rate of the spontaneous emission ( $1/\tau_{\text{se}}$ ) is obtained to be  $1.0 \times 10^6 \text{ s}^{-1}$  by extrapolating the plot to  $T = 0 \text{ K}$  on the assumption that it was independent of temperature. By assuming the relation that  $1/\tau_i = 1/\tau_{\text{se}} + 1/\tau_{\text{nr}}$ , the natural logarithm of  $1/\tau_{\text{nr}} = 1/\tau_i - 1/\tau_{\text{se}}$  is plotted against  $1/T$  as below:

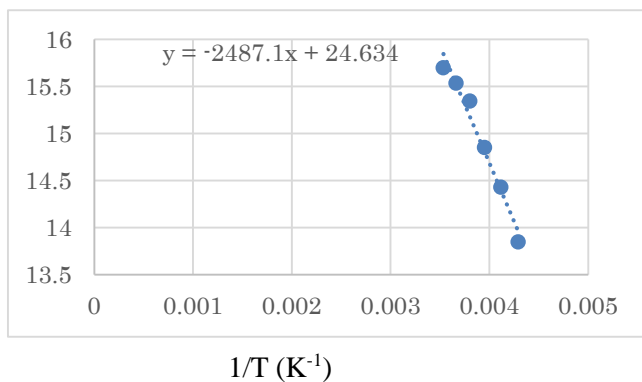

Figure S6. The plot of the rate of non-radiative decay against temperature in case of  $[\text{Cd}(\text{4-ethylpyridine})_2][\text{Au}(\text{CN})_2]_2$ .

From the slope of the activation energy for  $1/\tau_{\text{nr}}$  was obtained to be  $20.7 \text{ kJ mol}^{-1}$  (or  $1700 \text{ cm}^{-1}$ ). As for the slow component in the decay of emission, no such analysis was performed since the rate value of  $k_2$  was so scattered because of the error involved.

**S6. The excitation spectra of [Cd(pyridine derivative)<sub>2</sub>][Au(CN)<sub>2</sub>]<sub>2</sub>**

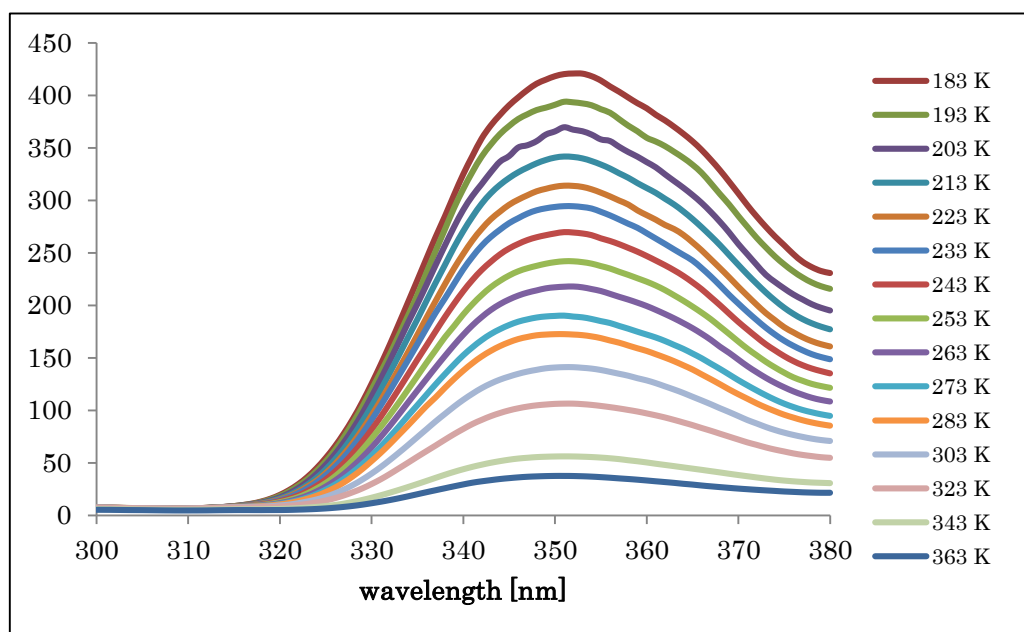

Figure S7. Excitation Spectra of [Cd(4-ethylpyridine)<sub>2</sub>][Au(CN)<sub>2</sub>]<sub>2</sub> ( $\lambda_{em}=460$  nm)

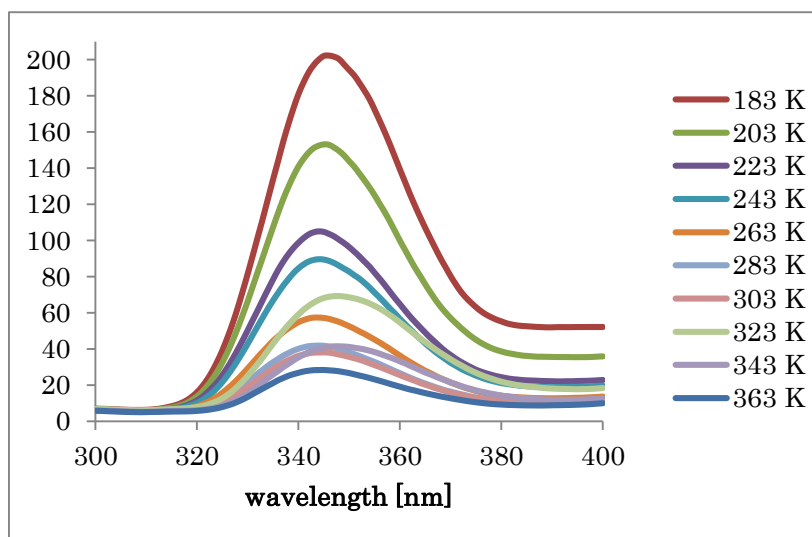

Figure S8. Excitation Spectra of [Cd(3,5-lutidine)<sub>2</sub>][Au(CN)<sub>2</sub>]<sub>2</sub> ( $\lambda_{em}=460$  nm)

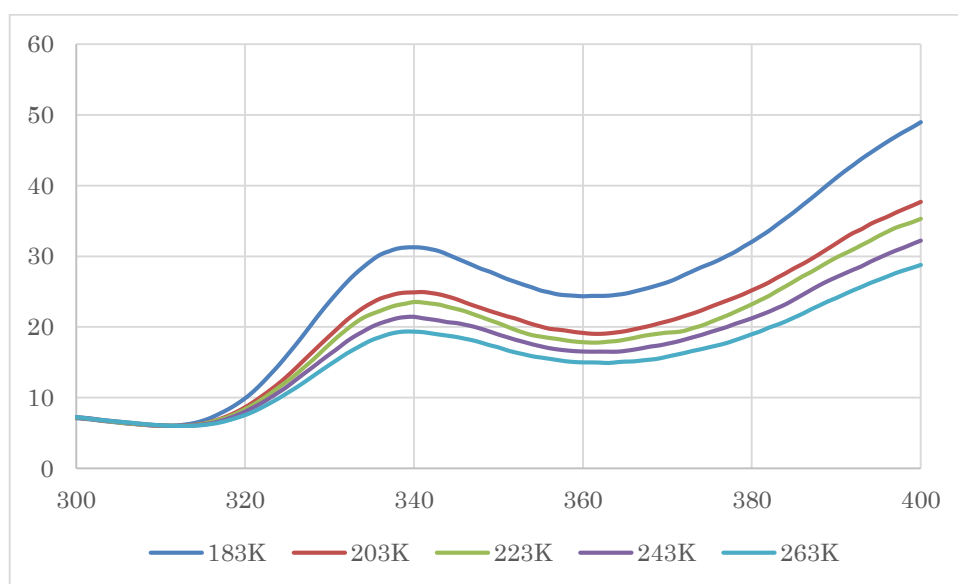

Figure S9. Excitation Spectra of  $[\text{Cd}(\text{3-fluoropyridine})_2][\text{Au}(\text{CN})_2]_2$  ( $\lambda_{\text{em}} = 440 \text{ nm}$ )
